# Supplementary material
Source: Research Square preprint supplement (doi:10.21203/rs.3.rs-10119735/v1)
Supplement: Supplementary file 1 [file 4fe4a7d516bfbbe43255e4f7.docx]

**Experimental evidence of ants’ role in the carbon cycle: ant biochemicals rapidly increase silicate dissolution weathering under laboratory conditions**

**Nathan E. Smith* • Taro Schmeeckle • Diana Convey • Jennifer Fewell • Ronald I. Dorn**

*Corresponding author

Nathan E. Smith, College of Arts and Sciences, Bucknell University, Lewisburg PA 17837 USA

Email: nes009@bucknell.edu

T. Schmeeckle, Department of Geographical Sciences & Urban Planning, Arizona State University, Tempe AZ 85287 USA USA Email: cars636@gmail.com

Jennifer H. Fewell, School of Life Sciences, Arizona State University, Tempe AZ 85287 USA

Email: j.fewell@asu.edu

Diana Convey, Eyring Materials Center, Arizona State University, Tempe AZ 85287 USA

Email: Diana.Convey@asu.edu

R.I. Dorn, School of Geographical Sciences & Urban Planning, Arizona State University, Tempe AZ 85287 USA

Email: ronald.dorn@asu.edu

**Supplemental Materials**

Supplemental methods:

Electron Microscopic composition of Plagioclase:

51.10% SiO2, 30.63% Al2O3, 0.02% TiO2, 0.23 FeO, 0.01 MnO, 0.01% MgO, 16.64% CaO, 2.11% N2O, 0.19% K2O, 99.35% total

Treatment solution pH measurements:

Because prior research reveals that deionized water would be expected to dissolve plagioclase surfaces, with the effect being pH dependent (18-19), we measured the pH of WAE and the deionized water control using a Beckman ϕ™ 360 pH meter. The pH of the WAE treatment solution was 6.62, and the pH of the deionized water used to make WAE was 7.00

Sample size for each treatment:

WAE was applied to 33 locations on Sample A. Deionized water, the solvent used to prepare WAE, was applied to 34 locations on Sample B. The 33 locations on Sample C were treated with AHS, and hexane (the AHS solvent control) was applied to 33 locations on Sample D.

Supplemental Results

Supplemental Table 1. Sample roughness values before and after exposure to treatment solutions

| Sample | Number of sampling locations | Treatment | Median Initial Rq ± SE | Median Final Rq ± SE | Change in RQ ± SE |
| --- | --- | --- | --- | --- | --- |
| A | 33 | WAE | 6.81 ± 0.6602 | 41.162 ± 5.380 | 35.356 ± 31.124 |
| B | 34 | DI H20 (WAE control) | 6.242 ± 4.290 | 11.592 ± 4.468 | 5.350 ± 5.874 |
| C | 33 | CHC | 8.365 ± 3.934 | 13.671 ± 5.164 | 5.306 ± 5.358 |
| D | 33 | Hexane (CHC control) | 5.615 ± 3.32 | 9.053 ± 5.746 | 3.438 ± 3.402 |

**Appendix 1**

All of the atomic force microscopy images before and after treatment with the experimental solutions can be found at the following link. The surface roughness measurements are also available in the same repository:

http://datadryad.org/share/LINK_NOT_FOR_PUBLICATION/Qw7BL3U3gmt5zMpnUULpe5-mAcIzgFxjitIhVJyV_cI
